# Supplementary material for: Zika Virus Exploits Lipid Rafts to Infect Host Cells
Source: MDPI journal article supplement (doi:10.3390/v14092059), 2022-09-16
Supplement: s1 [file s1]

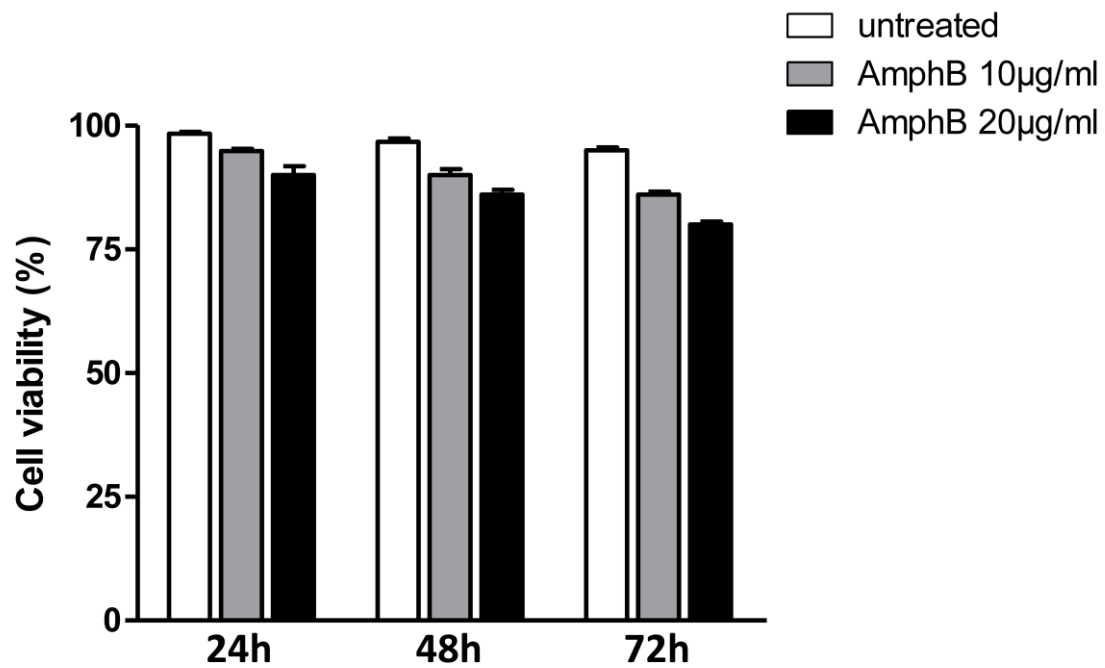

Figure S1. Cell viability analysis after AmphB treatment.

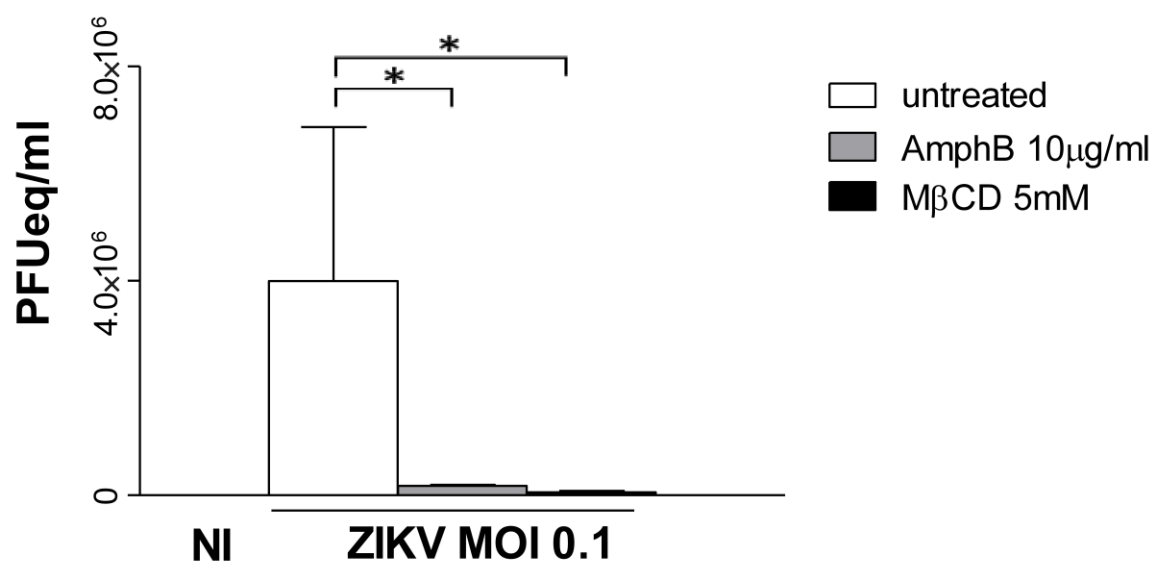

Figure S2. MβCD inhibits ZIKV replication in Vero cells. \* *p* value < 0.05.
